# Supplementary material for: Development and validation of a novel T cell proliferation-related prognostic model for predicting survival and immunotherapy benefits in melanoma
Source: publisher site journal article supplement (doi:10.18632/aging.204748), 2023-05-24
Supplement: Supplementary file [file aging-v15i10-204748-supplementary-material-SD1.pdf]

## SUPPLEMENTARY TABLES

**Supplementary Table 1. Coefficient values of 6 signature genes in the multivariate Cox analysis.**

| <b>Id</b> | <b>Coef</b>  |
|-----------|--------------|
| SOD2      | -0.321664227 |
| C1RL      | -0.224770485 |
| HAPLN3    | -0.373204795 |
| IFITM1    | -0.210704663 |
| BGN       | 0.188468569  |
| EGFR      | 0.454558562  |

**Supplementary Table 5. Summary of 33 recognized drivers of T cell proliferation-related genes.**

| <b>Gene</b> | <b>Type</b>                     |
|-------------|---------------------------------|
| IFNL2       | drivers of T cell proliferation |
| LTBR        | drivers of T cell proliferation |
| IL1RN       | drivers of T cell proliferation |
| CXCL12      | drivers of T cell proliferation |
| CRLF2       | drivers of T cell proliferation |
| IL12B       | drivers of T cell proliferation |
| NFYB        | drivers of T cell proliferation |
| BATF        | drivers of T cell proliferation |
| FOSB        | drivers of T cell proliferation |
| ATF6B       | drivers of T cell proliferation |
| AHNAK       | drivers of T cell proliferation |
| SLC10A7     | drivers of T cell proliferation |
| CALML3      | drivers of T cell proliferation |
| CLIC1       | drivers of T cell proliferation |
| RAN         | drivers of T cell proliferation |
| CDK2        | drivers of T cell proliferation |
| MS4A3       | drivers of T cell proliferation |
| CDK1        | drivers of T cell proliferation |
| DBI         | drivers of T cell proliferation |
| CYP27A1     | drivers of T cell proliferation |
| AKR1C4      | drivers of T cell proliferation |
| DUPD1       | drivers of T cell proliferation |
| GPD1        | drivers of T cell proliferation |
| GPN3        | drivers of T cell proliferation |
| AHCY        | drivers of T cell proliferation |
| ADA         | drivers of T cell proliferation |
| ITM2A       | drivers of T cell proliferation |
| HOMER1      | drivers of T cell proliferation |
| MRPL18      | drivers of T cell proliferation |
| MRPL51      | drivers of T cell proliferation |
| LIG3        | drivers of T cell proliferation |
| ZNF830      | drivers of T cell proliferation |
| DCLRE1B     | drivers of T cell proliferation |

**Supplementary Table 6. The primer sequences for qRT-PCR.**

| <b>Gene</b> | <b>Primer sequence</b>                                             |
|-------------|--------------------------------------------------------------------|
| SOD2        | F: 5'-GCTCCGGTTTTGGGGTATCTG-3'<br>R: 5'-GCGTTGATGTGAGGTTCCAG-3'    |
| C1RL        | F: 5'-TACCCAGAGCCGTATGGCAA-3'<br>R: 5'-GAACCGACGAATGAGATTGTGA-3'   |
| HAPLN3      | F: 5'-CCAGACAGGACTCCAGAAGATT-3'<br>R: 5'-GGCAGTAGCGAAGCAGAAT-3'    |
| IFITM1      | F: 5'-CCAAGGTCCACCGTGATTAAC-3'<br>R: 5'-ACCAGTTCAAGAAGAGGGTGTT-3'  |
| BGN         | F: 5'-GGTGGTCTATCTGCACTCCAA-3'<br>R: 5'-GGCTGATGCCGTTGTAGTAGG-3'   |
| EGFR        | F: 5'-AGGCACGAGTAACAAGCTCAC-3'<br>R: 5'-ATGAGGACATAACCAGCCACC-3'   |
| 36B4        | F: 5'-ATCCCTGACGCACCGCCGTGA-3'<br>R: 5'-TGCATCTGCTTGGAGCCCACGTT-3' |
