# Supplementary material for: Development and validation of a novel T cell proliferation-related prognostic model for predicting survival and immunotherapy benefits in melanoma
Source: Aging (Albany NY). 2023 May 24;15(10):4444–64. doi: 10.18632/aging.204748 (PMC10258015; doi:10.18632/aging.204748)
Supplement: Supplementary Tables 2-4 [file aging-15-204748-s002.xlsx]

## Sheet: Supplementary Table 2
Supplementary Table 2. Clinical information of 470 melanoma cancer patients (TCGA).
Id	futime	fustat	Age	Gender	Stage	T_stage	N_stage	M_stage	Dataset
TCGA-DA-A95Z	396	0	87	MALE	Stage IV	TX	M1a	N0	TCGA
TCGA-FS-A1ZF	470	1	78	FEMALE	Stage IIC	T4b	M0	N0	TCGA
TCGA-D3-A2J8	1992	1	48	MALE	Stage IB	T2a	M0	N0	TCGA
TCGA-ER-A2NC	1333	1	50	MALE	Stage IB	T2a	M0	N0	TCGA
TCGA-RP-A693	10	0	77	MALE	Stage IV	TX	M1c	NX	TCGA
TCGA-EB-A82C	17	0	70	FEMALE	Stage IIC	T4b	M0	N0	TCGA
TCGA-W3-AA1R	3379	1	71	MALE	Stage II	T3	M0	N0	TCGA
TCGA-EE-A2GU	2884	0	65	FEMALE	Stage IA	T1a	M0	N0	TCGA
TCGA-BF-A1PZ	853	0	71	FEMALE	Stage IIB	T4a	M0	N0	TCGA
TCGA-FS-A1ZQ	4062	1	31	MALE	I/II NOS	TX	M0	N0	TCGA
TCGA-EE-A20I	412	1	79	MALE	Stage IV	TX	M1c	N0	TCGA
TCGA-FR-A44A	5299	0	29	FEMALE	Stage II	T3a	M0	N0	TCGA
TCGA-D3-A3C6	1766	1	54	FEMALE	Stage IB	T2a	M0	N0	TCGA
TCGA-EE-A3AE	1658	0	52	FEMALE	Stage IA	T1a	M0	N0	TCGA
TCGA-GN-A262	3847	0	47	FEMALE	unknow	unknow	unknow	unknow	TCGA
TCGA-ER-A2NE	613	1	39	MALE	Stage 0	Tis	M0	N0	TCGA
TCGA-D3-A51R	1941	0	60	MALE	Stage IIA	T3a	M0	N0	TCGA
TCGA-EB-A97M	414	0	66	MALE	Stage IIC	T4b	M0	N0	TCGA
TCGA-WE-A8ZQ	1818	0	48	MALE	Stage IIA	T3a	M0	N0	TCGA
TCGA-ER-A42K	394	1	40	FEMALE	Stage IIIC	T4b	M0	N3	TCGA
TCGA-EE-A2MT	2166	0	45	MALE	Stage IB	T2a	M0	N0	TCGA
TCGA-DA-A960	804	0	73	MALE	Stage IIB	T3b	M0	N0	TCGA
TCGA-XV-AAZY	405	0	76	FEMALE	Stage IIIC	T4	M0	N3	TCGA
TCGA-EE-A2M6	3932	0	61	MALE	Stage I	T1	M0	N0	TCGA
TCGA-GN-A264	3587	1	60	MALE	unknow	unknow	unknow	unknow	TCGA
TCGA-ER-A19O	unknow	1	56	MALE	Stage IIIB	T3b	M0	N1b	TCGA
TCGA-D9-A6E9	301	0	75	FEMALE	Stage IIIA	T3a	M0	N1	TCGA
TCGA-EE-A2MN	1446	1	58	MALE	Stage I	T2	M0	N0	TCGA
TCGA-DA-A1I4	1093	1	51	MALE	Stage IIIC	T3b	M0	N2b	TCGA
TCGA-EE-A3AB	3733	0	30	MALE	Stage III	T0	M0	N2a	TCGA
TCGA-DA-A3F8	492	0	39	MALE	Stage IIIB	T2a	M0	N2b	TCGA
TCGA-BF-AAP6	325	0	55	MALE	Stage III	T4b	M0	N2	TCGA
TCGA-FS-A1ZD	1628	1	63	MALE	Stage IIA	T2b	M0	N0	TCGA
TCGA-D9-A4Z3	505	0	73	FEMALE	Stage IIIC	T4b	M0	N1b	TCGA
TCGA-D3-A8GB	938	1	48	MALE	Stage IIIB	T3a	M0	N1b	TCGA
TCGA-DA-A95V	1455	0	83	FEMALE	Stage IIC	T4b	unknow	N0	TCGA
TCGA-EE-A2A5	1195	1	43	MALE	Stage IB	T2a	M0	N0	TCGA
TCGA-D9-A3Z4	519	1	54	MALE	Stage IIIC	T4b	M0	N3	TCGA
TCGA-FR-A8YE	3176	0	41	MALE	Stage IA	T1a	M0	N0	TCGA
TCGA-EE-A2GC	2051	0	82	MALE	Stage IIB	T3b	M0	N0	TCGA
TCGA-EE-A29G	2192	1	53	MALE	Stage IIIA	T4a	M0	N2a	TCGA
TCGA-EE-A29S	1864	1	79	MALE	Stage IIA	T3a	M0	N0	TCGA
TCGA-D3-A3MO	284	1	47	MALE	Stage III	TX	M0	N2c	TCGA
TCGA-WE-A8ZO	2057	0	73	FEMALE	Stage IIIB	T3a	M0	N1b	TCGA
TCGA-BF-A9VF	440	0	77	MALE	Stage IIC	T4b	M0	N0	TCGA
TCGA-YD-A89C	210	0	43	FEMALE	Stage IA	T1a	M0	NX	TCGA
TCGA-EE-A2GT	1365	0	77	MALE	Stage IIA	T3a	M0	N0	TCGA
TCGA-HR-A5NC	0	0	90	FEMALE	unknow	T4	M0	NX	TCGA
TCGA-ER-A19G	9188	0	48	FEMALE	unknow	unknow	M0	N0	TCGA
TCGA-D3-A3CB	5065	0	39	MALE	I/II NOS	T2	M0	N0	TCGA
TCGA-EB-A44P	376	0	58	FEMALE	Stage IIC	T4b	M0	N0	TCGA
TCGA-EB-A6R0	467	0	58	FEMALE	Stage IIC	T4b	M0	N0	TCGA
TCGA-D3-A8GD	718	0	63	FEMALE	Stage IIIC	T4b	M0	N3	TCGA
TCGA-ER-A197	424	1	83	FEMALE	Stage IIIB	T4b	M0	N1a	TCGA
TCGA-EE-A29X	545	1	58	FEMALE	Stage IB	T2a	M0	N0	TCGA
TCGA-YD-A9TA	1496	0	75	MALE	unknow	unknow	unknow	unknow	TCGA
TCGA-EE-A2GE	4898	0	44	MALE	Stage I	T2	M0	N0	TCGA
TCGA-EB-A57M	399	0	56	MALE	Stage IIIB	T4b	M0	N1	TCGA
TCGA-EB-A85J	360	0	66	FEMALE	Stage IIB	T4a	M0	N0	TCGA
TCGA-D3-A2JB	5110	1	70	FEMALE	Stage 0	Tis	M0	N0	TCGA
TCGA-D3-A1QB	2912	0	75	FEMALE	Stage III	T0	M0	N2c	TCGA
TCGA-D3-A2JE	841	1	75	FEMALE	Stage IIIC	TX	M0	N3	TCGA
TCGA-DA-A3F5	6446	0	45	MALE	Stage I	T1a	M0	N0	TCGA
TCGA-EE-A2M5	659	1	49	MALE	Stage I	T2	M0	N0	TCGA
TCGA-D3-A2JA	3514	0	68	MALE	Stage IIIA	T2a	M0	N1a	TCGA
TCGA-ER-A19H	4634	1	40	MALE	unknow	unknow	M0	N0	TCGA
TCGA-EE-A3JA	1618	1	44	MALE	Stage IB	T2a	M0	N0	TCGA
TCGA-FS-A4F8	5318	1	52	MALE	Stage I	T1	M0	N0	TCGA
TCGA-WE-A8ZR	274	1	49	MALE	Stage IIIC	T4b	M0	N1b	TCGA
TCGA-EE-A3JD	832	1	70	MALE	Stage III	TX	M0	N2b	TCGA
TCGA-Z2-AA3S	2950	0	58	MALE	Stage IA	T1a	M0	N0	TCGA
TCGA-ER-A198	1544	1	45	MALE	unknow	unknow	M0	NX	TCGA
TCGA-ER-A42L	4533	0	49	MALE	Stage II	T3	M0	N0	TCGA
TCGA-FR-A7U8	847	0	50	MALE	Stage IIIC	TX	M0	N3	TCGA
TCGA-EB-A41B	291	0	76	FEMALE	Stage IIC	T4b	M0	N0	TCGA
TCGA-EB-A44O	81	0	69	MALE	Stage IIB	T4a	M0	N0	TCGA
TCGA-GN-A267	1960	1	38	MALE	Stage IIIA	T4a	M0	N1a	TCGA
TCGA-EE-A2MI	6225	1	43	MALE	Stage IIB	T4	M0	N0	TCGA
TCGA-ER-A19N	1341	1	47	MALE	unknow	unknow	unknow	unknow	TCGA
TCGA-EB-A3XC	650	0	74	MALE	Stage IIC	T4b	M0	N0	TCGA
TCGA-EE-A2M7	877	1	66	MALE	Stage II	T3a	M0	N0	TCGA
TCGA-EB-A42Z	441	0	49	MALE	Stage IIIC	T4b	M0	N1b	TCGA
TCGA-D3-A8GI	1780	1	68	MALE	Stage IA	T1a	M0	N0	TCGA
TCGA-FR-A728	583	0	54	FEMALE	Stage IIIB	T4b	M0	N2a	TCGA
TCGA-D3-A8GQ	884	1	66	MALE	Stage II	T3	M0	N0	TCGA
TCGA-DA-A1I5	3280	0	27	FEMALE	Stage IV	T1a	M1c	N0	TCGA
TCGA-EE-A2GK	1665	0	46	FEMALE	Stage I	T1	M0	N0	TCGA
TCGA-BF-A5EO	703	0	65	MALE	Stage IIC	T4b	M0	N0	TCGA
TCGA-ER-A3EV	1429	1	55	MALE	Stage III	T4	M0	N0	TCGA
TCGA-EB-A4OY	593	0	65	FEMALE	Stage IIIB	T4b	M0	N1a	TCGA
TCGA-D3-A3CF	746	1	61	FEMALE	Stage IIIC	T4b	M0	N3	TCGA
TCGA-XV-AB01	403	0	54	FEMALE	Stage II	T3	M0	NX	TCGA
TCGA-EE-A29E	1940	0	54	MALE	Stage IIIB	T3a	M0	N1b	TCGA
TCGA-DA-A1IC	2071	1	81	MALE	Stage IIIB	T3a	M0	N2c	TCGA
TCGA-EE-A180	2889	1	69	MALE	Stage III	T4a	M0	N0	TCGA
TCGA-D3-A5GS	553	0	58	MALE	Stage IV	T1b	M1c	N1b	TCGA
TCGA-EE-A3AC	1570	0	47	MALE	Stage III	T0	M0	N2b	TCGA
TCGA-FS-A1ZZ	822	1	54	FEMALE	Stage IIB	T3b	M0	N0	TCGA
TCGA-WE-A8K1	1492	0	74	MALE	Stage IIIC	T3b	M0	N3	TCGA
TCGA-FR-A8YC	1059	1	78	MALE	Stage IIB	T3b	M0	N0	TCGA
TCGA-FS-A1Z7	237	1	19	MALE	Stage IIIC	T4b	M0	N1b	TCGA
TCGA-FS-A1ZK	728	1	68	MALE	Stage II	T4	M0	N0	TCGA
TCGA-D3-A3CC	2644	0	69	FEMALE	Stage IIC	T4b	M0	N0	TCGA
TCGA-WE-A8JZ	731	0	70	MALE	Stage IIIB	T4b	M0	N1a	TCGA
TCGA-ER-A19M	1857	1	36	MALE	Stage IB	T2a	M0	N0	TCGA
TCGA-FS-A1ZN	730	1	43	MALE	Stage IIIA	T4b	M0	N1a	TCGA
TCGA-D3-A8GL	2711	1	43	MALE	Stage IIIB	T2a	M0	N1b	TCGA
TCGA-EB-A5UN	1582	0	49	MALE	Stage IIC	T4b	M0	NX	TCGA
TCGA-EE-A17X	907	1	54	MALE	Stage IA	T1a	M0	N0	TCGA
TCGA-EE-A2GD	10346	1	58	FEMALE	Stage IIB	T4	M0	N0	TCGA
TCGA-EB-A3XE	180	0	77	FEMALE	Stage IIA	T3a	M0	N0	TCGA
TCGA-FR-A726	0	0	90	MALE	Stage IIC	T4b	M0	N0	TCGA
TCGA-D9-A4Z2	190	1	50	MALE	Stage IIIC	T4b	M0	N3	TCGA
TCGA-FS-A4FC	1655	1	75	FEMALE	Stage IIA	T3a	M0	N0	TCGA
TCGA-XV-AAZW	393	1	62	FEMALE	Stage II	T4	M0	N0	TCGA
TCGA-EB-A1NK	613	0	48	MALE	Stage IIC	T4b	M0	N0	TCGA
TCGA-EE-A2GJ	2270	0	83	MALE	Stage IA	T1a	M0	N0	TCGA
TCGA-EE-A20B	4070	0	66	FEMALE	Stage II	T3	M0	N0	TCGA
TCGA-EE-A2MK	4825	0	18	FEMALE	Stage III	T4a	M0	N0	TCGA
TCGA-GF-A3OT	301	0	58	FEMALE	Stage IIIC	T3	M0	N3	TCGA
TCGA-FS-A1ZG	295	1	60	FEMALE	Stage IIIC	T4b	M0	N2b	TCGA
TCGA-EE-A182	447	1	84	FEMALE	Stage IIIC	T4b	M0	N1b	TCGA
TCGA-FS-A1Z3	636	1	72	FEMALE	Stage IV	TX	M1	N0	TCGA
TCGA-ER-A19W	4507	1	48	FEMALE	unknow	unknow	unknow	unknow	TCGA
TCGA-ER-A19P	4930	1	47	FEMALE	unknow	unknow	M0	N0	TCGA
TCGA-ER-A19C	1487	1	77	MALE	Stage I	T2a	M0	NX	TCGA
TCGA-BF-A5ES	490	0	76	FEMALE	Stage IIC	T4b	M0	N0	TCGA
TCGA-D9-A1X3	551	0	63	MALE	unknow	T4b	unknow	N2b	TCGA
TCGA-D3-A1Q7	4053	0	42	FEMALE	Stage IB	T1b	M0	N0	TCGA
TCGA-EB-A4P0	326	1	82	MALE	Stage IIC	T4b	M0	N0	TCGA
TCGA-D3-A3MV	1378	0	38	FEMALE	Stage IIIB	T2b	M0	N2a	TCGA
TCGA-EE-A2GM	2296	0	70	FEMALE	Stage IIC	T4b	M0	N0	TCGA
TCGA-FR-A7U9	571	0	63	FEMALE	Stage IIIC	T3b	M0	N3	TCGA
TCGA-FS-A1ZB	1486	1	57	MALE	Stage II	T3a	M0	N0	TCGA
TCGA-QB-A6FS	220	0	49	MALE	Stage IIIC	T0	M0	N3	TCGA
TCGA-WE-A8ZY	1506	1	62	MALE	Stage IIA	T3a	M0	NX	TCGA
TCGA-EE-A2MF	8174	1	39	FEMALE	Stage I	T2	M0	N0	TCGA
TCGA-EB-A4XL	777	0	56	FEMALE	Stage IIC	T4b	M0	NX	TCGA
TCGA-EE-A185	151	1	55	FEMALE	Stage IIIC	T4b	M0	N3	TCGA
TCGA-GN-A4U3	3708	0	30	MALE	Stage III	T3a	M0	N1a	TCGA
TCGA-EB-A3XB	408	0	63	MALE	Stage II	T4	M0	NX	TCGA
TCGA-EE-A2A0	1424	1	77	FEMALE	Stage IIA	T3a	M0	N0	TCGA
TCGA-DA-A3F3	319	1	52	MALE	Stage IIIB	T0	M0	N2b	TCGA
TCGA-EE-A3AF	420	1	48	FEMALE	Stage IIIC	T0	M0	N3	TCGA
TCGA-D3-A3BZ	3976	0	63	MALE	Stage IIB	T4a	M0	N0	TCGA
TCGA-ER-A3ET	2829	1	64	FEMALE	Stage IIIA	T3a	M0	N1a	TCGA
TCGA-RP-A694	21	0	71	MALE	Stage IV	TX	M1c	NX	TCGA
TCGA-EE-A29C	2402	1	20	MALE	Stage IB	T2a	M0	N0	TCGA
TCGA-EE-A2MH	516	1	66	MALE	Stage III	T4a	M0	N0	TCGA
TCGA-EB-A5UM	414	0	48	FEMALE	Stage IIC	T4b	M0	N0	TCGA
TCGA-EE-A2MC	1871	1	73	MALE	Stage I	T2	M0	N0	TCGA
TCGA-BF-A1PV	14	0	74	FEMALE	Stage IIC	T4b	M0	N0	TCGA
TCGA-GF-A6C8	62	0	62	FEMALE	Stage IIB	T3b	M0	NX	TCGA
TCGA-XV-A9VZ	0	0	90	FEMALE	Stage II	T4	M0	N0	TCGA
TCGA-GN-A4U7	317	1	56	FEMALE	Stage IIIC	T2b	M0	N3	TCGA
TCGA-DA-A95W	398	0	52	MALE	Stage IIIB	TX	M0	N1b	TCGA
TCGA-D3-A3C3	unknow	0	unknow	FEMALE	I/II NOS	TX	M0	N0	TCGA
TCGA-D3-A51K	1002	0	51	MALE	Stage IIIB	Tis	M0	N2b	TCGA
TCGA-D3-A2JD	361	1	58	MALE	Stage IIIC	T4b	M0	N1b	TCGA
TCGA-EB-A5VU	321	1	56	MALE	Stage IIIB	T4b	M0	N1	TCGA
TCGA-WE-A8ZN	1794	0	57	MALE	Stage IIB	T4a	M0	NX	TCGA
TCGA-FS-A1ZH	996	1	71	FEMALE	Stage IV	T3b	M1c	N2c	TCGA
TCGA-D3-A51F	1695	0	51	MALE	Stage IIIC	T4b	M0	N1b	TCGA
TCGA-BF-AAP2	405	0	62	MALE	Stage IIB	T3b	M0	N0	TCGA
TCGA-ER-A19L	4000	1	35	MALE	unknow	unknow	unknow	unknow	TCGA
TCGA-W3-A825	1917	1	60	FEMALE	Stage II	T3	M0	N0	TCGA
TCGA-GN-A265	2948	0	53	MALE	unknow	unknow	unknow	unknow	TCGA
TCGA-D3-A2JG	3453	1	30	FEMALE	Stage IIIA	T3a	M0	N1a	TCGA
TCGA-EB-A5SG	2076	0	57	FEMALE	unknow	unknow	unknow	unknow	TCGA
TCGA-W3-A828	3683	1	66	MALE	Stage II	T3	M0	N0	TCGA
TCGA-FS-A1ZA	843	1	45	FEMALE	Stage IIIB	T4b	M0	N2c	TCGA
TCGA-OD-A75X	9061	1	49	MALE	unknow	TX	M0	NX	TCGA
TCGA-EB-A5SE	401	1	73	MALE	Stage IIB	T3b	M0	NX	TCGA
TCGA-D3-A8GK	5177	0	45	MALE	Stage IIA	T3a	M0	N0	TCGA
TCGA-BF-AAP4	335	0	61	MALE	Stage IIC	T4b	M0	N0	TCGA
TCGA-EE-A2MP	7563	0	34	FEMALE	Stage I	T2	M0	N0	TCGA
TCGA-FW-A5DY	587	0	48	FEMALE	Stage III	T3	unknow	N1	TCGA
TCGA-EB-A5KH	619	1	55	MALE	Stage III	T0	M0	N1	TCGA
TCGA-EE-A2MM	5107	1	63	FEMALE	Stage I	T2	M0	N0	TCGA
TCGA-EB-A5FP	454	1	65	FEMALE	Stage IV	T4b	M1b	NX	TCGA
TCGA-FS-A1ZR	347	1	36	MALE	Stage II	T2	M0	N0	TCGA
TCGA-WE-A8ZT	359	0	25	FEMALE	Stage IV	T3b	M1b	N1b	TCGA
TCGA-D3-A2J6	1321	1	65	MALE	Stage IIB	T3b	M0	N0	TCGA
TCGA-EE-A29Q	2030	1	70	FEMALE	Stage IIB	T3b	M0	N0	TCGA
TCGA-EE-A2GS	2470	1	28	FEMALE	Stage IB	T2a	M0	N0	TCGA
TCGA-D3-A1QA	2765	0	55	MALE	Stage IB	T2a	M0	N0	TCGA
TCGA-D9-A1JW	111	0	82	MALE	unknow	T1a	M0	N2a	TCGA
TCGA-ER-A2ND	710	1	57	FEMALE	Stage IIIC	T1b	M0	N3	TCGA
TCGA-GN-A26C	821	1	77	MALE	Stage IIIC	T4b	M0	N2b	TCGA
TCGA-EE-A2ME	3141	1	51	MALE	Stage I	T2	M0	N0	TCGA
TCGA-WE-AAA3	600	0	84	FEMALE	Stage IIIC	T4b	M0	N2b	TCGA
TCGA-BF-A3DM	601	0	63	MALE	Stage IIA	T2b	M0	N0	TCGA
TCGA-D3-A3MU	1209	0	53	MALE	Stage IIIA	T3a	M0	N2a	TCGA
TCGA-FR-A3YN	2828	0	44	MALE	Stage IB	T2a	M0	N0	TCGA
TCGA-D9-A3Z3	678	0	39	FEMALE	Stage IIIB	T3a	M0	N1b	TCGA
TCGA-EE-A3J7	1949	0	43	MALE	Stage I	T2	M0	N0	TCGA
TCGA-D3-A2JF	1888	0	74	MALE	Stage IA	T1a	M0	N0	TCGA
TCGA-EE-A29L	79	1	78	MALE	Stage IIIC	T4b	M0	N3	TCGA
TCGA-FS-A4FB	813	1	46	FEMALE	Stage III	T2	M0	N1a	TCGA
TCGA-D3-A5GN	4129	0	15	FEMALE	Stage I	T1	M0	N0	TCGA
TCGA-XV-AAZV	412	0	56	FEMALE	Stage II	T4	M0	N0	TCGA
TCGA-D9-A149	1663	0	65	FEMALE	unknow	TX	M0	N1b	TCGA
TCGA-DA-A1HW	428	0	37	FEMALE	Stage IIIB	T1a	M0	N1b	TCGA
TCGA-ER-A2NB	857	1	57	MALE	Stage IIIB	T4b	M0	N2	TCGA
TCGA-D3-A1Q3	507	1	64	MALE	Stage IIC	T4b	M0	N0	TCGA
TCGA-D3-A2J7	3136	1	67	MALE	Stage IIIC	T3b	M0	N1b	TCGA
TCGA-ER-A2NG	1490	1	43	FEMALE	Stage IIIC	T3b	M0	N3	TCGA
TCGA-FS-A1ZE	1413	1	40	MALE	Stage IIC	T4b	M0	N0	TCGA
TCGA-DA-A95X	1513	0	62	MALE	Stage IB	T2a	M0	N0	TCGA
TCGA-FS-A4FD	2454	1	39	MALE	Stage IIIC	T2	M0	N3	TCGA
TCGA-GN-A26D	1460	1	72	FEMALE	Stage IIC	T4b	unknow	N0	TCGA
TCGA-3N-A9WC	2022	0	82	MALE	Stage IIA	T2b	M0	NX	TCGA
TCGA-D3-A1Q6	2184	1	55	MALE	Stage III	T4	M0	N1b	TCGA
TCGA-ER-A2NF	877	1	53	MALE	Stage IIIB	T3b	M0	N3	TCGA
TCGA-FS-A1Z0	6164	1	32	FEMALE	Stage IA	T1a	M0	N0	TCGA
TCGA-BF-A1Q0	831	0	80	MALE	Stage IIC	T4b	M0	N0	TCGA
TCGA-EE-A2GR	1301	1	78	MALE	Stage II	T4	M0	N0	TCGA
TCGA-WE-AAA0	1065	0	47	MALE	Stage IA	T1a	M0	N0	TCGA
TCGA-EE-A29P	1716	0	73	FEMALE	Stage IIC	T4b	M0	N0	TCGA
TCGA-WE-A8K5	1860	1	65	MALE	Stage IV	T2a	M1c	N3	TCGA
TCGA-YG-AA3N	306	0	67	MALE	Stage IIC	T4b	M0	N0	TCGA
TCGA-DA-A1IB	454	0	69	FEMALE	Stage IIIC	T2b	M0	N2b	TCGA
TCGA-EB-A430	unknow	1	83	MALE	Stage IIC	T4b	M0	N0	TCGA
TCGA-BF-A1PX	282	1	56	MALE	Stage IIIB	T4b	M0	N2a	TCGA
TCGA-FS-A4F2	1525	1	46	FEMALE	Stage IIC	T4b	M0	N0	TCGA
TCGA-GN-A8LN	603	0	68	MALE	Stage IIC	T4b	M0	NX	TCGA
TCGA-EB-A299	378	0	63	MALE	Stage IIA	T2b	M0	N0	TCGA
TCGA-EE-A2MU	1620	0	71	MALE	Stage IA	T1a	M0	N0	TCGA
TCGA-ER-A199	279	1	86	FEMALE	Stage IIIC	T4b	M0	N3	TCGA
TCGA-BF-AAP8	447	0	58	MALE	Stage IIC	T4b	M0	N0	TCGA
TCGA-ER-A194	1354	1	77	MALE	unknow	unknow	M0	N0	TCGA
TCGA-EB-A5UL	526	0	71	MALE	Stage III	TX	M0	N1	TCGA
TCGA-EE-A29H	1966	0	59	FEMALE	Stage IA	T1a	M0	N0	TCGA
TCGA-D3-A51N	688	0	56	FEMALE	Stage IV	T0	M1c	N3	TCGA
TCGA-EB-A5SH	1643	0	60	FEMALE	Stage III	T4	M0	N0	TCGA
TCGA-EE-A2MJ	2927	1	60	MALE	Stage III	T4b	M0	N0	TCGA
TCGA-RP-A690	6	0	66	FEMALE	unknow	unknow	unknow	unknow	TCGA
TCGA-EE-A29B	2588	1	67	MALE	Stage IIB	T3b	M0	N0	TCGA
TCGA-QB-AA9O	549	1	73	MALE	Stage IIIC	TX	M0	N3	TCGA
TCGA-EB-A550	264	1	75	FEMALE	Stage IIC	T4b	M0	NX	TCGA
TCGA-FS-A1ZJ	1441	1	75	FEMALE	Stage I	T2	M0	N0	TCGA
TCGA-EB-A3HV	39	0	37	MALE	Stage IIC	T4b	M0	N0	TCGA
TCGA-3N-A9WB	518	1	71	MALE	Stage IA	T1a	M0	NX	TCGA
TCGA-W3-AA21	3195	1	26	MALE	Stage I	T2	M0	N0	TCGA
TCGA-D3-A8GC	2421	1	48	MALE	Stage IIIC	TX	M0	N3	TCGA
TCGA-FS-A1ZT	1617	0	55	MALE	Stage III	T2	M0	N1b	TCGA
TCGA-EE-A181	1026	1	82	FEMALE	Stage II	T3	M0	N0	TCGA
TCGA-D3-A8GP	4638	0	77	MALE	Stage III	T2	M0	N2c	TCGA
TCGA-BF-AAP0	454	0	40	FEMALE	Stage IV	T4	M1	NX	TCGA
TCGA-DA-A1I8	1368	0	63	FEMALE	Stage IIC	T4b	M0	N0	TCGA
TCGA-D3-A5GO	4195	0	61	MALE	Stage II	T4	M0	N0	TCGA
TCGA-D3-A51T	818	0	59	FEMALE	Stage IIIC	T4b	M0	N1b	TCGA
TCGA-ER-A19F	802	1	82	MALE	unknow	unknow	M0	N0	TCGA
TCGA-EB-A44R	315	1	52	MALE	Stage IIIB	TX	M0	N2b	TCGA
TCGA-FS-A1Z4	854	1	62	MALE	Stage I	T1	M0	N0	TCGA
TCGA-FR-A3YO	unknow	0	unknow	FEMALE	I/II NOS	T2	M0	N0	TCGA
TCGA-BF-AAP1	409	0	86	MALE	Stage IIC	T4b	M0	N0	TCGA
TCGA-D9-A3Z1	468	1	66	MALE	Stage IIIC	T2a	M0	N3	TCGA
TCGA-EB-A6L9	757	0	55	MALE	Stage IIIC	TX	M0	N3	TCGA
TCGA-ER-A42H	426	1	76	MALE	unknow	unknow	unknow	unknow	TCGA
TCGA-ER-A19S	1505	0	81	FEMALE	unknow	unknow	unknow	unknow	TCGA
TCGA-ER-A1A1	3196	0	58	MALE	Stage IIIC	TX	M0	N3	TCGA
TCGA-DA-A1I1	5941	0	55	MALE	Stage III	T0	M0	N2a	TCGA
TCGA-D3-A3C1	unknow	0	unknow	MALE	I/II NOS	TX	M0	N0	TCGA
TCGA-EB-A82B	390	0	58	FEMALE	Stage III	T4b	M0	N2	TCGA
TCGA-EE-A29A	1927	1	68	MALE	Stage IIIA	T3a	M0	N1a	TCGA
TCGA-EB-A431	568	0	34	MALE	Stage IIC	T4b	M0	N0	TCGA
TCGA-FS-A4F5	874	1	77	FEMALE	Stage IB	T2a	M0	N0	TCGA
TCGA-EB-A42Y	440	0	73	FEMALE	Stage IIC	T4b	M0	N0	TCGA
TCGA-D3-A2JK	368	1	24	MALE	Stage IIIC	T4b	M0	N2b	TCGA
TCGA-D3-A51J	4414	0	19	MALE	Stage III	T0	M0	N1b	TCGA
TCGA-WE-A8ZX	991	0	45	MALE	Stage IIIB	TX	M0	N1b	TCGA
TCGA-EE-A29T	11252	0	51	FEMALE	unknow	TX	M0	NX	TCGA
TCGA-ER-A19J	196	1	54	MALE	Stage IV	TX	M1	N3	TCGA
TCGA-W3-AA1W	6666	0	64	MALE	Stage II	T3	M0	N0	TCGA
TCGA-BF-A1PU	387	0	46	FEMALE	Stage IIC	T4b	M0	N0	TCGA
TCGA-EB-A3XF	278	0	57	MALE	Stage IIC	T4b	M0	N0	TCGA
TCGA-GN-A4U9	673	1	71	MALE	Stage IIIC	T2b	M0	N3	TCGA
TCGA-EB-A4IS	405	0	77	MALE	Stage IIB	T3b	M0	NX	TCGA
TCGA-FS-A4F0	2367	0	67	FEMALE	Stage IIB	T4a	M0	N0	TCGA
TCGA-BF-A5EP	335	0	75	FEMALE	Stage IIIC	T4b	M0	N3	TCGA
TCGA-EB-A41A	0	0	90	MALE	Stage IIC	T4b	M0	N0	TCGA
TCGA-ER-A193	955	1	62	MALE	Stage IIB	T3b	M0	N0	TCGA
TCGA-D3-A2JO	2010	0	50	FEMALE	Stage IIIC	TX	M0	N3	TCGA
TCGA-LH-A9QB	11217	0	24	FEMALE	unknow	unknow	unknow	unknow	TCGA
TCGA-D3-A3CE	1832	1	74	FEMALE	Stage III	T0	M0	N1b	TCGA
TCGA-D3-A5GL	3826	0	74	MALE	Stage IB	T2a	M0	N0	TCGA
TCGA-EE-A3J5	1124	1	71	MALE	Stage III	T4a	M0	N1	TCGA
TCGA-EE-A29D	425	1	87	MALE	Stage IIIC	T3b	M0	N1b	TCGA
TCGA-EE-A2A6	2620	0	43	MALE	Stage IA	T1a	M0	N0	TCGA
TCGA-D3-A51E	5318	0	39	FEMALE	I/II NOS	T2	M0	N0	TCGA
TCGA-EE-A2GH	6328	0	34	MALE	Stage I	T2	M0	N0	TCGA
TCGA-EE-A2A2	1120	0	71	MALE	Stage IIIC	T4b	M0	N1b	TCGA
TCGA-GN-A9SD	1807	1	59	FEMALE	Stage IA	T1a	M0	NX	TCGA
TCGA-EE-A183	818	1	48	MALE	Stage 0	Tis	M0	N0	TCGA
TCGA-EE-A17Z	263	1	57	MALE	Stage IIB	T4a	M0	N0	TCGA
TCGA-GF-A6C9	480	0	78	MALE	Stage IIIB	unknow	unknow	unknow	TCGA
TCGA-D9-A4Z5	218	0	68	MALE	Stage IIB	T4a	M0	N0	TCGA
TCGA-D3-A1Q1	504	1	79	FEMALE	Stage IIIC	T1b	M0	N3	TCGA
TCGA-EB-A3Y7	326	1	86	FEMALE	Stage IIIB	T3a	M0	N2c	TCGA
TCGA-ER-A3PL	1010	0	30	MALE	Stage IV	T3b	M1a	N0	TCGA
TCGA-D3-A5GU	3808	0	36	MALE	Stage IB	T1b	M0	N0	TCGA
TCGA-EE-A2GP	423	1	80	MALE	Stage IIIB	T4b	M0	N1a	TCGA
TCGA-FS-A1YW	6598	1	52	MALE	Stage IB	T1b	M0	N0	TCGA
TCGA-D3-A2JN	2022	1	46	FEMALE	Stage III	T0	M0	N1b	TCGA
TCGA-FS-A1ZC	10870	1	51	MALE	I/II NOS	TX	M0	N0	TCGA
TCGA-EE-A2MS	4942	0	72	MALE	Stage II	T3a	M0	N0	TCGA
TCGA-W3-A824	6940	0	63	MALE	Stage I	T2	M0	N0	TCGA
TCGA-FS-A1ZW	1505	0	65	MALE	Stage IIIB	T2b	M0	N1a	TCGA
TCGA-D9-A1JX	216	1	80	FEMALE	unknow	TX	M0	NX	TCGA
TCGA-EE-A3JB	6138	0	60	FEMALE	Stage III	T3a	M0	N1	TCGA
TCGA-EE-A2GI	1482	0	39	MALE	Stage IA	T1a	M0	N0	TCGA
TCGA-EE-A3JH	3333	0	54	MALE	Stage IB	T2	M0	N0	TCGA
TCGA-D3-A2JP	1812	0	37	MALE	Stage IIIC	T0	M0	N3	TCGA
TCGA-ER-A19Q	1548	1	37	FEMALE	unknow	unknow	M0	N0	TCGA
TCGA-FR-A8YD	1103	1	56	FEMALE	Stage IIC	T4b	M0	N0	TCGA
TCGA-BF-A3DJ	464	0	36	FEMALE	Stage IIIB	T4b	M0	N1	TCGA
TCGA-EE-A20F	2785	0	53	MALE	Stage I	T1	M0	N0	TCGA
TCGA-EE-A3AG	1265	1	25	MALE	Stage III	T0	M0	N2c	TCGA
TCGA-EE-A29V	787	1	85	MALE	Stage IIIC	T3b	M0	N1b	TCGA
TCGA-EE-A20H	5118	1	56	MALE	Stage I	T2	M0	N0	TCGA
TCGA-ER-A19E	396	1	36	FEMALE	Stage IB	T2a	M0	N0	TCGA
TCGA-GN-A4U5	1156	0	61	FEMALE	Stage IB	T2a	M0	NX	TCGA
TCGA-EE-A3J3	5237	1	42	MALE	Stage IB	T2	M0	N0	TCGA
TCGA-FW-A3TU	1691	1	72	FEMALE	unknow	unknow	unknow	unknow	TCGA
TCGA-EE-A2MD	1438	1	52	MALE	Stage II	T3a	M0	N0	TCGA
TCGA-EE-A2GB	1803	0	51	MALE	Stage IIIB	T2b	M0	N1a	TCGA
TCGA-XV-A9W5	392	0	51	MALE	I/II NOS	T2	M0	N0	TCGA
TCGA-GN-A8LL	650	1	68	FEMALE	Stage IIC	T4b	M0	NX	TCGA
TCGA-BF-A5ER	327	0	63	MALE	Stage IIC	T4b	M0	N0	TCGA
TCGA-BF-AAOX	444	0	83	MALE	Stage IIC	T4b	M0	N0	TCGA
TCGA-EB-A44Q	422	0	51	FEMALE	Stage IIIC	TX	M0	N3	TCGA
TCGA-BF-AAP7	318	0	76	FEMALE	Stage IIC	T4b	M0	N0	TCGA
TCGA-Z2-A8RT	839	0	42	FEMALE	Stage IIB	T3b	M0	N0	TCGA
TCGA-D3-A1Q8	854	1	33	MALE	Stage IV	T0	M1b	N3	TCGA
TCGA-EE-A2M8	601	1	54	FEMALE	Stage III	T3a	M0	N1	TCGA
TCGA-EB-A553	226	0	62	MALE	Stage IIC	T4b	M0	N0	TCGA
TCGA-BF-A3DN	717	0	81	FEMALE	Stage IIIC	T3b	M0	N3	TCGA
TCGA-ER-A3ES	7514	1	25	MALE	unknow	unknow	unknow	unknow	TCGA
TCGA-EB-A85I	362	0	66	MALE	Stage IIC	T4b	M0	N0	TCGA
TCGA-FR-A69P	478	0	34	FEMALE	Stage IIIC	TX	unknow	N3	TCGA
TCGA-EE-A3AD	875	1	50	MALE	Stage III	T0	M0	N1b	TCGA
TCGA-EB-A24D	645	0	72	MALE	Stage IIIB	T4a	M0	N2b	TCGA
TCGA-D9-A4Z6	561	1	54	MALE	Stage IIIC	T3b	M0	N1b	TCGA
TCGA-FR-A3R1	685	0	69	MALE	Stage IIC	T4b	M0	N0	TCGA
TCGA-FS-A1ZY	824	1	71	MALE	Stage IIB	T3b	M0	N0	TCGA
TCGA-FW-A3I3	531	0	59	FEMALE	Stage IV	unknow	M1	N0	TCGA
TCGA-EB-A4IQ	414	0	42	FEMALE	Stage IIIB	T4b	M0	N1	TCGA
TCGA-ER-A19K	469	1	79	FEMALE	Stage IIC	T4b	M0	N0	TCGA
TCGA-FW-A3TV	411	0	57	FEMALE	Stage IIIB	T1	M0	N2b	TCGA
TCGA-EE-A2GN	3106	1	67	MALE	Stage IIA	T2b	M0	N0	TCGA
TCGA-FR-A7UA	1164	0	65	FEMALE	Stage IB	T2a	M0	N0	TCGA
TCGA-DA-A3F2	657	0	55	MALE	Stage IIIB	T4a	M0	N2b	TCGA
TCGA-Z2-AA3V	486	0	57	FEMALE	Stage IA	T1a	M0	N0	TCGA
TCGA-FR-A2OS	368	1	49	FEMALE	Stage IIC	T4b	M0	N0	TCGA
TCGA-EE-A2MQ	1315	1	70	FEMALE	Stage IIIA	T3a	M0	N2a	TCGA
TCGA-FR-A729	6716	0	38	FEMALE	Stage I	T1	M0	N0	TCGA
TCGA-FS-A1YY	6953	1	55	FEMALE	Stage IIA	T3a	M0	N0	TCGA
TCGA-BF-A3DL	769	0	84	FEMALE	Stage IIIB	T3b	M0	N2	TCGA
TCGA-YG-AA3P	439	0	63	FEMALE	Stage IIB	T4a	M0	N0	TCGA
TCGA-DA-A1I7	1876	0	62	MALE	Stage IIIB	T0	M0	N2b	TCGA
TCGA-WE-A8K4	509	0	85	MALE	Stage IIB	T4a	M0	NX	TCGA
TCGA-EE-A2MR	4088	0	61	MALE	Stage I	T2	M0	N0	TCGA
TCGA-EB-A3Y6	126	0	56	FEMALE	Stage IIC	T4b	M0	N0	TCGA
TCGA-BF-AAOU	476	0	73	FEMALE	Stage IIC	T4b	M0	N0	TCGA
TCGA-ER-A19D	383	1	46	FEMALE	Stage IB	T2a	M0	N0	TCGA
TCGA-D3-A1Q9	961	1	72	MALE	Stage IIIB	T4b	M0	N2a	TCGA
TCGA-D3-A2JC	2639	0	53	FEMALE	Stage III	T0	M0	N2b	TCGA
TCGA-DA-A1HV	1502	0	75	FEMALE	Stage IIIB	T0	M0	N2b	TCGA
TCGA-EE-A2GL	2423	0	40	FEMALE	Stage IIA	T3a	M0	N0	TCGA
TCGA-ER-A19T	270	1	51	MALE	Stage IV	T4a	M1a	N3	TCGA
TCGA-D3-A2JH	1280	0	68	MALE	Stage IB	T1b	M0	N0	TCGA
TCGA-GN-A268	1910	1	83	FEMALE	Stage IIB	T4a	M0	N0	TCGA
TCGA-WE-A8K6	486	0	79	MALE	Stage IIIB	TX	M0	N1b	TCGA
TCGA-GF-A2C7	21	0	48	MALE	Stage IIC	T4b	M0	N0	TCGA
TCGA-EE-A2ML	6590	1	35	MALE	Stage II	T3a	M0	N0	TCGA
TCGA-D3-A1Q4	3408	0	53	FEMALE	Stage IIIC	T2b	M0	N1b	TCGA
TCGA-D3-A51G	unknow	0	unknow	MALE	Stage 0	Tis	M0	N0	TCGA
TCGA-EE-A2A1	3130	0	46	MALE	Stage IB	T2a	M0	N0	TCGA
TCGA-GN-A269	170	1	70	MALE	Stage IIIC	T4b	M0	N3	TCGA
TCGA-D3-A8GN	4897	0	27	FEMALE	I/II NOS	TX	M0	N0	TCGA
TCGA-D3-A8GJ	7342	0	18	MALE	Stage II	T3	M0	N0	TCGA
TCGA-D3-A3ML	422	1	70	MALE	Stage IIIA	T3a	M0	N2a	TCGA
TCGA-W3-AA1Q	2101	1	57	MALE	Stage III	TX	M0	N1	TCGA
TCGA-HR-A2OG	7	0	50	FEMALE	unknow	unknow	unknow	unknow	TCGA
TCGA-EE-A3AA	3781	0	47	MALE	Stage III	T0	M0	N2a	TCGA
TCGA-FS-A4F4	2028	1	64	MALE	Stage II	T3a	M0	N0	TCGA
TCGA-EE-A29M	1729	0	33	FEMALE	Stage IB	T2a	M0	N0	TCGA
TCGA-WE-AAA4	678	0	56	FEMALE	Stage IIIC	TX	M0	N3	TCGA
TCGA-DA-A1I2	5088	0	45	MALE	Stage III	T4b	M0	N2b	TCGA
TCGA-WE-A8ZM	3008	0	70	MALE	Stage IIIB	TX	M0	N1b	TCGA
TCGA-FS-A1ZU	808	1	70	FEMALE	Stage IIC	T4b	M0	N0	TCGA
TCGA-D3-A2JL	5219	0	43	FEMALE	I/II NOS	TX	M0	N0	TCGA
TCGA-EB-A4OZ	620	0	41	FEMALE	Stage IIIC	T4a	M0	N3	TCGA
TCGA-ER-A196	1785	0	64	FEMALE	Stage IIC	T4b	M0	N0	TCGA
TCGA-FW-A5DX	640	0	71	MALE	Stage IIIC	T4a	unknow	N3	TCGA
TCGA-EB-A6QZ	352	1	76	FEMALE	Stage IIA	T3a	M0	N0	TCGA
TCGA-D3-A8GS	3564	1	52	MALE	Stage I	T1	M0	N0	TCGA
TCGA-DA-A95Y	430	1	68	MALE	Stage IIC	T4b	M0	N0	TCGA
TCGA-EE-A2GO	3857	0	66	FEMALE	Stage II	T3b	M0	N0	TCGA
TCGA-EE-A29W	5932	0	42	MALE	Stage 0	Tis	M0	N0	TCGA
TCGA-EE-A29N	566	1	78	MALE	I/II NOS	TX	M0	N0	TCGA
TCGA-EB-A551	590	0	78	FEMALE	Stage IIIC	T4b	M0	N2b	TCGA
TCGA-D3-A2J9	723	1	75	MALE	Stage IIIC	T4b	M0	N3	TCGA
TCGA-EE-A3JE	1562	0	75	MALE	Stage IIIB	T3b	M0	N1a	TCGA
TCGA-EE-A17Y	828	1	69	MALE	Stage IIIB	T3b	M0	N1a	TCGA
TCGA-D3-A3C8	1409	0	58	FEMALE	Stage IIIC	TX	M0	N3	TCGA
TCGA-D3-A3C7	1429	0	57	FEMALE	Stage III	T0	M0	N1b	TCGA
TCGA-EE-A2MG	3139	1	23	MALE	Stage I	T2	M0	N0	TCGA
TCGA-D3-A1Q5	3424	1	60	MALE	I/II NOS	TX	M0	N0	TCGA
TCGA-EB-A24C	632	0	56	MALE	unknow	T4b	M0	NX	TCGA
TCGA-XV-A9W2	417	0	81	MALE	Stage I	T1	M0	N0	TCGA
TCGA-D9-A6EC	2015	0	56	MALE	Stage IIIA	T3a	M0	N1	TCGA
TCGA-BF-A5EQ	323	0	63	MALE	Stage IIC	T4b	M0	N0	TCGA
TCGA-W3-AA1V	1280	1	63	MALE	Stage II	T3	M0	N0	TCGA
TCGA-FS-A1ZP	2273	1	52	MALE	Stage II	T3	M0	N0	TCGA
TCGA-GN-A4U4	1197	0	73	MALE	Stage IIA	T2b	M0	NX	TCGA
TCGA-D3-A8GE	804	0	26	MALE	Stage IV	TX	M1b	N0	TCGA
TCGA-EE-A3J8	1044	1	59	MALE	Stage IIIA	T4a	M0	N1a	TCGA
TCGA-EB-A5SF	369	1	78	FEMALE	Stage IIC	T4b	M0	NX	TCGA
TCGA-GF-A769	1070	1	39	MALE	Stage IIC	T4b	M0	NX	TCGA
TCGA-D3-A8GM	3259	1	73	MALE	Stage IIB	T3b	M0	N0	TCGA
TCGA-FS-A1ZM	3080	0	74	MALE	Stage III	T2	M0	N2c	TCGA
TCGA-YD-A9TB	unknow	0	unknow	FEMALE	unknow	unknow	unknow	unknow	TCGA
TCGA-EE-A3AH	4222	1	30	MALE	Stage II	T3b	M0	N0	TCGA
TCGA-GN-A266	308	1	45	MALE	unknow	unknow	unknow	unknow	TCGA
TCGA-EB-A5VV	214	0	74	FEMALE	Stage IIIB	T3b	M0	N1	TCGA
TCGA-EB-A3XD	430	0	53	FEMALE	Stage IIC	T4b	M0	NX	TCGA
TCGA-EE-A29R	440	0	48	FEMALE	Stage IIIC	T3b	M0	N1b	TCGA
TCGA-3N-A9WD	395	1	82	MALE	Stage IIIA	T2a	M0	N1a	TCGA
TCGA-EE-A20C	4601	1	59	MALE	Stage 0	Tis	M0	N0	TCGA
TCGA-D3-A8GV	5101	1	25	MALE	I/II NOS	TX	M0	N0	TCGA
TCGA-ER-A19A	2365	0	79	MALE	Stage IV	TX	M1	N0	TCGA
TCGA-ER-A2NH	1264	0	49	MALE	Stage IIIC	T3a	M0	N3	TCGA
TCGA-EE-A3J4	3869	1	72	MALE	Stage II	T3a	M0	N0	TCGA
TCGA-D9-A148	4609	0	40	MALE	unknow	TX	M1b	N3	TCGA
TCGA-FS-A1ZS	4526	0	54	MALE	Stage I	T2	M0	N0	TCGA
TCGA-ER-A19B	2993	1	42	MALE	unknow	TX	M0	N0	TCGA
TCGA-GN-A8LK	1524	1	70	MALE	Stage IB	T1b	unknow	NX	TCGA
TCGA-W3-AA1O	122	1	85	MALE	Stage III	TX	M0	N2	TCGA
TCGA-RP-A6K9	unknow	0	unknow	FEMALE	unknow	unknow	unknow	unknow	TCGA
TCGA-WE-AA9Y	370	0	37	MALE	Stage IIIC	T2a	M0	N3	TCGA
TCGA-EE-A3JI	4648	1	48	MALE	Stage I	T2	M0	N0	TCGA
TCGA-EB-A6QY	382	0	71	MALE	Stage IIC	T4b	M0	N0	TCGA
TCGA-GF-A4EO	591	0	74	FEMALE	Stage IIIC	T0	M0	N3	TCGA
TCGA-D3-A5GR	5424	0	23	FEMALE	Stage III	T1b	M0	N1	TCGA
TCGA-D9-A6EG	698	1	56	MALE	Stage IIIA	T4a	M0	N1	TCGA
TCGA-DA-A1I0	594	0	63	MALE	Stage IV	T4b	M1a	N3	TCGA
TCGA-FW-A3R5	1124	0	68	MALE	Stage III	TX	M0	N2	TCGA
TCGA-D3-A5GT	487	0	43	MALE	Stage IIIC	T2b	M0	N3	TCGA
TCGA-EE-A184	2073	1	72	MALE	Stage IB	T2a	M0	N0	TCGA
TCGA-YG-AA3O	1154	1	62	MALE	unknow	unknow	unknow	unknow	TCGA
TCGA-GN-A4U8	1487	0	51	MALE	unknow	unknow	unknow	unknow	TCGA
TCGA-RP-A695	unknow	0	unknow	MALE	Stage IV	TX	M1c	NX	TCGA
TCGA-FS-A4F9	1035	0	80	MALE	Stage IIIC	T4b	M0	N3	TCGA
TCGA-EB-A44N	205	1	59	MALE	Stage IIC	T4b	M0	N0	TCGA
TCGA-D9-A6EA	766	0	70	MALE	Stage IIIC	T4a	M0	N3	TCGA
TCGA-GN-A263	467	1	24	MALE	Stage IV	T4b	M1c	N3	TCGA
TCGA-EB-A51B	537	0	53	MALE	Stage IIC	T4b	M0	NX	TCGA
TCGA-D3-A3MR	3151	0	42	MALE	Stage III	T0	M0	N1b	TCGA
TCGA-GN-A26A	988	1	63	FEMALE	Stage IIIA	T3a	M0	N1a	TCGA
TCGA-DA-A1HY	3580	0	42	MALE	Stage III	T2b	M0	N1	TCGA
TCGA-D3-A8GO	unknow	1	unknow	FEMALE	I/II NOS	T2	M0	N0	TCGA
TCGA-FS-A1YX	1478	1	39	FEMALE	Stage I	T2	M0	N0	TCGA
TCGA-HR-A2OH	2004	1	46	FEMALE	Stage IIIB	T3b	M0	N2a	TCGA
TCGA-D3-A51H	1714	0	60	MALE	Stage IIIC	T1b	M0	N3	TCGA
TCGA-ER-A195	1078	1	46	MALE	unknow	TX	M0	N0	TCGA
TCGA-IH-A3EA	524	0	61	MALE	Stage IIC	T4b	M0	N0	TCGA
TCGA-D3-A8GR	3943	1	54	FEMALE	Stage 0	Tis	M0	N0	TCGA
TCGA-DA-A1IA	2005	1	32	FEMALE	Stage IIIB	T2a	M0	N1b	TCGA

## Sheet: Supplementary Table 3
Supplementary Table 3. Clinical information of validation cohorts (GSE65905; GSE54467).
Id	futime	fustat	Age	Gender	DATESET
GSM1608593	1714	0	55	Male	GSE65904
GSM1608594	353	1	39	Female	GSE65904
GSM1608595	2127	0	67	Female	GSE65904
GSM1608596	1442	0	56	Male	GSE65904
GSM1608597	66	1	46	Male	GSE65904
GSM1608598	2631	0	36	Female	GSE65904
GSM1608599	2427	0	73	Male	GSE65904
GSM1608600	1310	0	59	Male	GSE65904
GSM1608601	817	0	50	Male	GSE65904
GSM1608602	1401	1	77	Female	GSE65904
GSM1608603	101	0	88	Female	GSE65904
GSM1608604	3021	1	47	Male	GSE65904
GSM1608605	643	1	65	Male	GSE65904
GSM1608606	1344	1	44	Male	GSE65904
GSM1608607	1101	0	33	Male	GSE65904
GSM1608608	75	0	65	Female	GSE65904
GSM1608609	77	1	88	Male	GSE65904
GSM1608610	1485	1	50	Male	GSE65904
GSM1608611	93	0	85	Male	GSE65904
GSM1608612	849	1	72	Male	GSE65904
GSM1608613	171	0	79	Female	GSE65904
GSM1608614	195	1	55	Female	GSE65904
GSM1608615	1266	0	61	Female	GSE65904
GSM1608616	6343	0	68	Male	GSE65904
GSM1608617	820	0	56	Male	GSE65904
GSM1608618	NA	NA	46	Female	GSE65904
GSM1608619	189	0	65	Male	GSE65904
GSM1608620	453	1	65	Male	GSE65904
GSM1608621	1220	0	50	Male	GSE65904
GSM1608622	559	0	82	Female	GSE65904
GSM1608623	834	1	74	Male	GSE65904
GSM1608624	1030	0	61	Male	GSE65904
GSM1608625	3206	0	51	Male	GSE65904
GSM1608626	1199	1	61	Male	GSE65904
GSM1608627	5212	0	34	Female	GSE65904
GSM1608628	592	1	51	Male	GSE65904
GSM1608629	50	0	71	Male	GSE65904
GSM1608630	1187	0	73	Male	GSE65904
GSM1608631	419	1	76	Female	GSE65904
GSM1608632	208	1	88	Male	GSE65904
GSM1608633	2481	1	64	Female	GSE65904
GSM1608634	267	0	78	Male	GSE65904
GSM1608635	435	1	74	Male	GSE65904
GSM1608636	742	1	56	Male	GSE65904
GSM1608637	97	1	70	Male	GSE65904
GSM1608638	451	0	54	Male	GSE65904
GSM1608639	3779	0	NA	Female	GSE65904
GSM1608640	194	1	62	Male	GSE65904
GSM1608641	2574	0	55	Male	GSE65904
GSM1608642	1260	0	60	Male	GSE65904
GSM1608643	634	0	58	Female	GSE65904
GSM1608644	22	0	78	Male	GSE65904
GSM1608645	591	1	74	Male	GSE65904
GSM1608646	105	0	86	Female	GSE65904
GSM1608647	1455	0	65	Male	GSE65904
GSM1608648	1404	1	43	Male	GSE65904
GSM1608649	378	1	35	Female	GSE65904
GSM1608650	2530	1	39	Male	GSE65904
GSM1608651	550	1	52	Male	GSE65904
GSM1608652	3185	0	59	Male	GSE65904
GSM1608653	310	1	77	Male	GSE65904
GSM1608654	282	0	71	Female	GSE65904
GSM1608655	3315	0	54	Female	GSE65904
GSM1608656	275	1	61	Male	GSE65904
GSM1608657	3582	0	70	Male	GSE65904
GSM1608658	484	0	73	Male	GSE65904
GSM1608659	731	0	77	Female	GSE65904
GSM1608660	875	0	81	Female	GSE65904
GSM1608661	12	1	58	Male	GSE65904
GSM1608662	642	1	53	Male	GSE65904
GSM1608663	461	0	74	Female	GSE65904
GSM1608664	1406	0	71	Female	GSE65904
GSM1608665	1329	1	39	Male	GSE65904
GSM1608666	1172	0	46	Female	GSE65904
GSM1608667	164	0	43	Female	GSE65904
GSM1608668	365	1	48	Male	GSE65904
GSM1608669	2584	0	52	Male	GSE65904
GSM1608670	2619	0	63	Male	GSE65904
GSM1608671	399	1	71	Male	GSE65904
GSM1608672	5530	0	55	Female	GSE65904
GSM1608673	6097	0	75	Male	GSE65904
GSM1608674	1312	0	56	Male	GSE65904
GSM1608675	120	1	59	Female	GSE65904
GSM1608676	340	0	65	Female	GSE65904
GSM1608677	429	1	34	Female	GSE65904
GSM1608678	6453	0	80	Female	GSE65904
GSM1608679	1313	0	59	Male	GSE65904
GSM1608680	279	1	65	Male	GSE65904
GSM1608681	1112	0	75	Female	GSE65904
GSM1608682	111	0	56	Female	GSE65904
GSM1608683	195	1	63	Female	GSE65904
GSM1608684	734	0	81	Male	GSE65904
GSM1608685	542	1	57	Male	GSE65904
GSM1608686	82	1	22	Male	GSE65904
GSM1608687	303	1	76	Male	GSE65904
GSM1608688	91	1	76	Female	GSE65904
GSM1608689	51	0	78	Male	GSE65904
GSM1608690	455	1	77	Male	GSE65904
GSM1608691	71	0	71	Male	GSE65904
GSM1608692	424	0	71	Female	GSE65904
GSM1608693	574	1	83	Male	GSE65904
GSM1608694	1027	0	68	Female	GSE65904
GSM1608695	5632	0	66	Male	GSE65904
GSM1608696	1429	0	79	Female	GSE65904
GSM1608697	303	1	62	Female	GSE65904
GSM1608698	333	0	65	Male	GSE65904
GSM1608699	82	1	73	Male	GSE65904
GSM1608700	493	1	84	Male	GSE65904
GSM1608701	170	0	77	Male	GSE65904
GSM1608702	358	0	58	Male	GSE65904
GSM1608703	2239	0	67	Female	GSE65904
GSM1608704	126	1	52	Female	GSE65904
GSM1608705	2319	0	64	Female	GSE65904
GSM1608706	707	1	61	Male	GSE65904
GSM1608707	1325	1	63	Male	GSE65904
GSM1608708	137	1	62	Male	GSE65904
GSM1608709	1432	1	71	Male	GSE65904
GSM1608710	6	1	66	Female	GSE65904
GSM1608711	158	0	49	Female	GSE65904
GSM1608712	386	1	81	Female	GSE65904
GSM1608713	652	0	47	Female	GSE65904
GSM1608714	5005	0	25	Female	GSE65904
GSM1608715	186	0	74	Female	GSE65904
GSM1608716	89	0	86	Male	GSE65904
GSM1608717	442	1	67	Female	GSE65904
GSM1608718	650	1	59	Male	GSE65904
GSM1608719	307	0	60	Male	GSE65904
GSM1608720	4450	0	81	Male	GSE65904
GSM1608721	188	1	59	Female	GSE65904
GSM1608722	1222	1	65	Male	GSE65904
GSM1608723	1231	0	77	Male	GSE65904
GSM1608724	623	1	67	Male	GSE65904
GSM1608725	197	1	84	Female	GSE65904
GSM1608726	318	0	63	Male	GSE65904
GSM1608727	380	1	33	Male	GSE65904
GSM1608728	1912	0	32	Male	GSE65904
GSM1608729	420	0	82	Male	GSE65904
GSM1608730	526	1	44	Female	GSE65904
GSM1608731	212	0	71	Female	GSE65904
GSM1608732	880	0	65	Female	GSE65904
GSM1608733	375	1	31	Male	GSE65904
GSM1608734	262	1	60	Male	GSE65904
GSM1608735	56	1	70	Male	GSE65904
GSM1608736	356	1	45	Female	GSE65904
GSM1608737	476	1	60	Male	GSE65904
GSM1608738	NA	NA	NA	Female	GSE65904
GSM1608739	638	1	89	Male	GSE65904
GSM1608740	435	1	63	Female	GSE65904
GSM1608741	43	0	64	Male	GSE65904
GSM1608742	42	1	73	Male	GSE65904
GSM1608743	337	1	71	Male	GSE65904
GSM1608744	392	1	68	Male	GSE65904
GSM1608745	593	1	63	Male	GSE65904
GSM1608746	957	1	48	Female	GSE65904
GSM1608747	678	0	77	Female	GSE65904
GSM1608748	324	0	87	Female	GSE65904
GSM1608749	634	1	55	Female	GSE65904
GSM1608750	647	0	29	Female	GSE65904
GSM1608751	732	1	67	Female	GSE65904
GSM1608752	252	0	91	Female	GSE65904
GSM1608753	411	1	58	Male	GSE65904
GSM1608754	336	1	72	Male	GSE65904
GSM1608755	132	1	62	Male	GSE65904
GSM1608756	861	0	70	Female	GSE65904
GSM1608757	1779	0	62	Female	GSE65904
GSM1608758	1958	1	70	Male	GSE65904
GSM1608759	93	1	70	Male	GSE65904
GSM1608760	72	1	69	Female	GSE65904
GSM1608761	461	1	47	Female	GSE65904
GSM1608762	456	0	69	Male	GSE65904
GSM1608763	2175	0	41	Male	GSE65904
GSM1608764	2800	0	55	Male	GSE65904
GSM1608765	66	1	52	Male	GSE65904
GSM1608766	307	0	67	Female	GSE65904
GSM1608767	44	1	68	Female	GSE65904
GSM1608768	1035	0	74	Female	GSE65904
GSM1608769	194	0	58	Female	GSE65904
GSM1608770	3363	0	57	Female	GSE65904
GSM1608771	163	1	72	Male	GSE65904
GSM1608772	523	0	61	Male	GSE65904
GSM1608773	511	0	53	Male	GSE65904
GSM1608774	411	1	73	Male	GSE65904
GSM1608775	85	1	55	Male	GSE65904
GSM1608776	NA	NA	NA	NA	GSE65904
GSM1608777	682	1	66	Female	GSE65904
GSM1608778	629	1	64	Male	GSE65904
GSM1608779	165	1	65	Male	GSE65904
GSM1608780	189	1	52	Female	GSE65904
GSM1608781	66	0	40	Male	GSE65904
GSM1608782	1479	0	30	Female	GSE65904
GSM1608783	64	1	34	Female	GSE65904
GSM1608784	174	0	54	Female	GSE65904
GSM1608785	1182	1	66	Male	GSE65904
GSM1608786	1253	1	79	Female	GSE65904
GSM1608787	685	0	82	Female	GSE65904
GSM1608788	491	1	48	Female	GSE65904
GSM1608789	736	1	51	Male	GSE65904
GSM1608790	1097	1	77	Male	GSE65904
GSM1608791	789	0	72	Male	GSE65904
GSM1608792	519	0	75	Male	GSE65904
GSM1608793	1784	0	71	Male	GSE65904
GSM1608794	566	0	64	Female	GSE65904
GSM1608795	1379	0	73	Female	GSE65904
GSM1608796	851	0	85	Male	GSE65904
GSM1608797	NA	NA	NA	Female	GSE65904
GSM1608798	308	0	36	Male	GSE65904
GSM1608799	2890	0	66	Female	GSE65904
GSM1608800	638	1	37	Male	GSE65904
GSM1608801	295	1	67	Male	GSE65904
GSM1608802	154	1	38	Female	GSE65904
GSM1608803	194	1	40	Female	GSE65904
GSM1608804	145	1	42	Female	GSE65904
GSM1608805	1194	0	72	Female	GSE65904
GSM1608806	1491	0	53	Male	GSE65904
GSM1315904	4342.8	0	19	Female	GSE54467
GSM1315905	1418.4	1	53	Male	GSE54467
GSM1315906	698.4	1	52	Female	GSE54467
GSM1315907	3330.6	0	51	Male	GSE54467
GSM1315908	4283.4	1	47	Male	GSE54467
GSM1315909	1540.5	1	61	Male	GSE54467
GSM1315910	6957.3	0	46	Female	GSE54467
GSM1315911	5484.9	1	61	Male	GSE54467
GSM1315912	1491.3	1	84	Female	GSE54467
GSM1315913	3899.7	0	44	Female	GSE54467
GSM1315914	3322.8	1	64	Male	GSE54467
GSM1315915	3034.8	0	31	Male	GSE54467
GSM1315916	654.9	1	63	Male	GSE54467
GSM1315917	1098.6	1	58	Male	GSE54467
GSM1315918	6538.2	0	56	Male	GSE54467
GSM1315919	3603.9	1	48	Female	GSE54467
GSM1315920	261.3	1	69	Male	GSE54467
GSM1315921	593.7	1	76	Male	GSE54467
GSM1315922	592.8	1	54	Female	GSE54467
GSM1315923	2242.8	Dead Not Melanoma	82	Male	GSE54467
GSM1315924	2393.7	0	79	Male	GSE54467
GSM1315925	2986.5	0	50	Male	GSE54467
GSM1315926	305.7	0	57	Female	GSE54467
GSM1315927	7826.4	0	32	Male	GSE54467
GSM1315928	589.8	1	77	Female	GSE54467
GSM1315929	588.9	1	56	Male	GSE54467
GSM1315930	644.1	1	39	Female	GSE54467
GSM1315931	3090	Dead Cause Unknown	84	Female	GSE54467
GSM1315932	1734.9	1	57	Female	GSE54467
GSM1315933	3096	1	23	Male	GSE54467
GSM1315934	3007.2	1	63	Male	GSE54467
GSM1315935	723.9	1	53	Male	GSE54467
GSM1315936	3205.5	0	72	Male	GSE54467
GSM1315937	3228.3	1	60	Male	GSE54467
GSM1315938	864.9	1	67	Male	GSE54467
GSM1315939	325.5	1	61	Male	GSE54467
GSM1315940	8526.6	0	35	Male	GSE54467
GSM1315941	2886.9	Dead Not Melanoma	60	Male	GSE54467
GSM1315942	2114.7	0	30	Male	GSE54467
GSM1315943	508.8	1	66	Male	GSE54467
GSM1315944	2062.5	1	50	Female	GSE54467
GSM1315945	3093.9	1	28	Male	GSE54467
GSM1315946	1426.2	1	58	Male	GSE54467
GSM1315947	1518.9	1	66	Female	GSE54467
GSM1315948	6582.6	0	49	Female	GSE54467
GSM1315949	446.7	1	69	Male	GSE54467
GSM1315950	3286.5	0	55	Male	GSE54467
GSM1315951	3098.1	1	52	Male	GSE54467
GSM1315952	4687.8	Dead Cause Unknown	61	Female	GSE54467
GSM1315953	1845.3	Dead Not Melanoma	74	Male	GSE54467
GSM1315954	2916.6	0	40	Male	GSE54467
GSM1315955	6242.4	Alive with Melanoma	36	Male	GSE54467
GSM1315956	3861.3	0	70	Female	GSE54467
GSM1315957	1219.2	0	67	Male	GSE54467
GSM1315958	5252.1	1	53	Male	GSE54467
GSM1315959	3633.6	0	64	Female	GSE54467
GSM1315960	5126.7	0	59	Male	GSE54467
GSM1315961	6904.2	Dead Cause Unknown	78	Male	GSE54467
GSM1315962	3878.1	0	62	Male	GSE54467
GSM1315963	12093.9	1	30	Male	GSE54467
GSM1315964	2208.3	1	40	Female	GSE54467
GSM1315965	3665.1	1	58	Female	GSE54467
GSM1315966	3431.4	0	39	Female	GSE54467
GSM1315967	650.1	1	49	Male	GSE54467
GSM1315968	4334.7	0	50	Male	GSE54467
GSM1315969	1256.4	0	24	Male	GSE54467
GSM1315970	2782.5	0	70	Female	GSE54467
GSM1315971	1875	Dead Not Melanoma	83	Male	GSE54467
GSM1315972	6019.5	0	68	Female	GSE54467
GSM1315973	1506	0	47	Male	GSE54467
GSM1315974	2405.7	0	48	Female	GSE54467
GSM1315975	582	1	52	Male	GSE54467
GSM1315976	5314.2	Alive with Melanoma	60	Female	GSE54467
GSM1315977	3722.4	1	45	Female	GSE54467
GSM1315978	3316.8	1	68	Female	GSE54467
GSM1315979	1305.9	Alive Status Unknown	78	Male	GSE54467
GSM1315980	708.3	1	56	Female	GSE54467
GSM1315981	121.2	1	74	Female	GSE54467
GSM1315982	3691.8	1	66	Male	GSE54467

## Sheet: Supplementary Table 4
Supplementary Table 4. Clinical information of immunotherapy cohorts (iMvigor210; GSE35640; PRJEB25780; PRJEB23709).
id	Response	Dateset
SAMc1b27bc16435	CR/PR	iMvigor210
SAMf275eb859a39	CR/PR	iMvigor210
SAMb2f1d0e54ece	CR/PR	iMvigor210
SAMd027124354ce	CR/PR	iMvigor210
SAM681e4bf7cf85	CR/PR	iMvigor210
SAM6cb230f208a8	CR/PR	iMvigor210
SAM0684af734db1	CR/PR	iMvigor210
SAMbf1a3ae828e6	CR/PR	iMvigor210
SAMb419a8fcbfcd	CR/PR	iMvigor210
SAM8884fe446d20	CR/PR	iMvigor210
SAM97a00e0929fb	CR/PR	iMvigor210
SAM075e037d95bc	CR/PR	iMvigor210
SAM2e9ac0b1b250	CR/PR	iMvigor210
SAMe712352fb82a	CR/PR	iMvigor210
SAM30b5c6c54cf7	CR/PR	iMvigor210
SAMb3c02294aba7	CR/PR	iMvigor210
SAM2570ff4aae6e	CR/PR	iMvigor210
SAMd35318127278	CR/PR	iMvigor210
SAM560f23d6a3ad	CR/PR	iMvigor210
SAM14df63a65411	CR/PR	iMvigor210
SAMffa5c7cad0e5	CR/PR	iMvigor210
SAMaec7380f9ab0	CR/PR	iMvigor210
SAMe50d15fde368	CR/PR	iMvigor210
SAM8533e5e261d6	CR/PR	iMvigor210
SAMaaf505c36f93	CR/PR	iMvigor210
SAM73663ee4a96e	CR/PR	iMvigor210
SAM3e04eb914f3d	CR/PR	iMvigor210
SAMc2a1820d4e6b	CR/PR	iMvigor210
SAMe1eb5d988760	CR/PR	iMvigor210
SAM6083aac8db99	CR/PR	iMvigor210
SAM8a1b0e02ee42	CR/PR	iMvigor210
SAMd7d57ee3a863	CR/PR	iMvigor210
SAM065890737112	CR/PR	iMvigor210
SAMb470eb8f04be	CR/PR	iMvigor210
SAMb15ac6e4c4ef	CR/PR	iMvigor210
SAMa535fcdf18a0	CR/PR	iMvigor210
SAM548551ef782c	CR/PR	iMvigor210
SAM203dcf14f927	CR/PR	iMvigor210
SAMd3bd67996035	CR/PR	iMvigor210
SAMd3601288319e	CR/PR	iMvigor210
SAMfb7aec7cb0e2	CR/PR	iMvigor210
SAMc1251c7bfee2	CR/PR	iMvigor210
SAM27299aed7681	CR/PR	iMvigor210
SAMd43f8933066b	CR/PR	iMvigor210
SAMc919aebc7fdd	CR/PR	iMvigor210
SAM670649e105b5	CR/PR	iMvigor210
SAM91c47b054ffb	CR/PR	iMvigor210
SAM7d7c54623618	CR/PR	iMvigor210
SAM3b15b4c6311d	CR/PR	iMvigor210
SAMeaa477a5384b	CR/PR	iMvigor210
SAM2eb07dedf07f	CR/PR	iMvigor210
SAM25510f300d79	CR/PR	iMvigor210
SAM7b40007f4aa4	CR/PR	iMvigor210
SAM14938611a2d3	CR/PR	iMvigor210
SAM771445e92421	CR/PR	iMvigor210
SAM727c0e92a2a7	CR/PR	iMvigor210
SAM6f2a102a99df	CR/PR	iMvigor210
SAM6ff654a20f98	CR/PR	iMvigor210
SAM07a93a28f801	CR/PR	iMvigor210
SAM58e7832f4e7d	CR/PR	iMvigor210
SAM5767dd75d142	CR/PR	iMvigor210
SAMcc7a42d87e9c	CR/PR	iMvigor210
SAM31d9176e11fb	CR/PR	iMvigor210
SAM572f19794c96	CR/PR	iMvigor210
SAM1abf01dd4544	CR/PR	iMvigor210
SAM1f66db567eb5	CR/PR	iMvigor210
SAM6157c8f38b72	CR/PR	iMvigor210
SAM4caabd64e7fd	CR/PR	iMvigor210
SAM7f0d9cc7f001	SD/PD	iMvigor210
SAM4305ab968b90	SD/PD	iMvigor210
SAMcf018fee2acd	SD/PD	iMvigor210
SAMcc4675f394a1	SD/PD	iMvigor210
SAM49f9b2e57aa5	SD/PD	iMvigor210
SAM2e7aa8fa0ab3	SD/PD	iMvigor210
SAMdf3e42c8672a	SD/PD	iMvigor210
SAM36d87392593b	SD/PD	iMvigor210
SAM36a9225b0222	SD/PD	iMvigor210
SAMe7bf6c015192	SD/PD	iMvigor210
SAM6dd7ad1d797d	SD/PD	iMvigor210
SAMc0d625a50eb8	SD/PD	iMvigor210
SAM18039827e1b9	SD/PD	iMvigor210
SAMc692536a795a	SD/PD	iMvigor210
SAM9a2cf3c06fb3	SD/PD	iMvigor210
SAM557dde1b9f3e	SD/PD	iMvigor210
SAM23aa15d4a0b0	SD/PD	iMvigor210
SAM468a9e1dc821	SD/PD	iMvigor210
SAM81b71522417a	SD/PD	iMvigor210
SAMb963dda93cfd	SD/PD	iMvigor210
SAMa9ca8536d2b1	SD/PD	iMvigor210
SAM9fb814c22bdb	SD/PD	iMvigor210
SAMbcbc7957c264	SD/PD	iMvigor210
SAM7fb6987514a4	SD/PD	iMvigor210
SAM63405b04ab2d	SD/PD	iMvigor210
SAM18bc1078bc15	SD/PD	iMvigor210
SAM7d2dfba6cd84	SD/PD	iMvigor210
SAMd1bd63734394	SD/PD	iMvigor210
SAMe9ae8beb82fa	SD/PD	iMvigor210
SAMb0a83e5fbde9	SD/PD	iMvigor210
SAMba7176afe070	SD/PD	iMvigor210
SAMae1690469964	SD/PD	iMvigor210
SAMbe83eae4026e	SD/PD	iMvigor210
SAMe5bc41772bc9	SD/PD	iMvigor210
SAM23095936e611	SD/PD	iMvigor210
SAM7114d99032ec	SD/PD	iMvigor210
SAMd215b503f99a	SD/PD	iMvigor210
SAMdb3f50c9129c	SD/PD	iMvigor210
SAM52e3fa3ad574	SD/PD	iMvigor210
SAMd4c0837b0997	SD/PD	iMvigor210
SAM9cafb905b36a	SD/PD	iMvigor210
SAM032c642382a7	SD/PD	iMvigor210
SAM2070b416069c	SD/PD	iMvigor210
SAM0ce9c983b20f	SD/PD	iMvigor210
SAMa1e62d323e1d	SD/PD	iMvigor210
SAM61baf919bb01	SD/PD	iMvigor210
SAM2f228939632f	SD/PD	iMvigor210
SAM9539a4f19ebc	SD/PD	iMvigor210
SAM36851bc8b9ae	SD/PD	iMvigor210
SAM297c0301e861	SD/PD	iMvigor210
SAM1fa6bcb7fc48	SD/PD	iMvigor210
SAM6d2ae0c39b96	SD/PD	iMvigor210
SAMcabb6d58ff55	SD/PD	iMvigor210
SAM716f54e468f4	SD/PD	iMvigor210
SAMeff2ce356ccb	SD/PD	iMvigor210
SAM110501d0eedb	SD/PD	iMvigor210
SAMc0ef41aa6c8b	SD/PD	iMvigor210
SAMd636e3461955	SD/PD	iMvigor210
SAMd98bac0a070f	SD/PD	iMvigor210
SAM8e8ef2368dfa	SD/PD	iMvigor210
SAM08cce2fa88f2	SD/PD	iMvigor210
SAMb4c7a001537d	SD/PD	iMvigor210
SAMfd947610629d	SD/PD	iMvigor210
SAM943df5cf15df	SD/PD	iMvigor210
SAM31f41dd0d6ca	SD/PD	iMvigor210
SAM39eb94fa504d	SD/PD	iMvigor210
SAM62fb1388c871	SD/PD	iMvigor210
SAMc0da5d48686d	SD/PD	iMvigor210
SAMe7bcab05402e	SD/PD	iMvigor210
SAM2dc3f04e45e9	SD/PD	iMvigor210
SAM4501e41e4751	SD/PD	iMvigor210
SAM5b57e47fdcb3	SD/PD	iMvigor210
SAMae4da274eded	SD/PD	iMvigor210
SAMa913c6139ec8	SD/PD	iMvigor210
SAM75142fcab9df	SD/PD	iMvigor210
SAMd697ba701077	SD/PD	iMvigor210
SAM166a419a4e5a	SD/PD	iMvigor210
SAM025b45c27e05	SD/PD	iMvigor210
SAMe07c4560772d	SD/PD	iMvigor210
SAM52500cabdd36	SD/PD	iMvigor210
SAMf3a9bce50099	SD/PD	iMvigor210
SAMdab9ca8fb5de	SD/PD	iMvigor210
SAM34430ef08e5b	SD/PD	iMvigor210
SAM4b0175e8db6e	SD/PD	iMvigor210
SAMf28c01545593	SD/PD	iMvigor210
SAMe94c30c30616	SD/PD	iMvigor210
SAM54e58f1b0230	SD/PD	iMvigor210
SAM5e3bae090b8c	SD/PD	iMvigor210
SAM3cb94b0d5297	SD/PD	iMvigor210
SAM61b9d4d84c64	SD/PD	iMvigor210
SAMcb132b0cdd2c	SD/PD	iMvigor210
SAMe97af0feefdf	SD/PD	iMvigor210
SAMee3844cc0b9f	SD/PD	iMvigor210
SAMdcae54fcd7fa	SD/PD	iMvigor210
SAMdad5c29dc105	SD/PD	iMvigor210
SAMa424c75831b4	SD/PD	iMvigor210
SAM28687037e4ff	SD/PD	iMvigor210
SAM45c8e6412c66	SD/PD	iMvigor210
SAM0bdb3428bd13	SD/PD	iMvigor210
SAM3330c03fdf00	SD/PD	iMvigor210
SAM0a7c2091dd56	SD/PD	iMvigor210
SAM7bff231634e9	SD/PD	iMvigor210
SAM5d1dfd5207f5	SD/PD	iMvigor210
SAMeb587a68006b	SD/PD	iMvigor210
SAM99a46b9eec27	SD/PD	iMvigor210
SAM1ac4e3dee297	SD/PD	iMvigor210
SAM553c3c35b847	SD/PD	iMvigor210
SAM822b226466a1	SD/PD	iMvigor210
SAMabc151b01ea3	SD/PD	iMvigor210
SAMe3210d3632b4	SD/PD	iMvigor210
SAMb15ad09d6e24	SD/PD	iMvigor210
SAM7893196e0e89	SD/PD	iMvigor210
SAM961d04c42bd9	SD/PD	iMvigor210
SAMb0d11db9aa79	SD/PD	iMvigor210
SAM19fec8f3b3bd	SD/PD	iMvigor210
SAMa90d73f8d891	SD/PD	iMvigor210
SAM415f36ad349e	SD/PD	iMvigor210
SAM7c67b05aa109	SD/PD	iMvigor210
SAMad83c9c53537	SD/PD	iMvigor210
SAM3e8baff50d7a	SD/PD	iMvigor210
SAM3ee5dcd894f0	SD/PD	iMvigor210
SAMeb29625f76a5	SD/PD	iMvigor210
SAM563d6233dfa2	SD/PD	iMvigor210
SAMa1871f491b02	SD/PD	iMvigor210
SAM30cf07d4874f	SD/PD	iMvigor210
SAMd135d5867fe3	SD/PD	iMvigor210
SAM9e11ec6bea80	SD/PD	iMvigor210
SAM675a12a09c15	SD/PD	iMvigor210
SAM1e9c4d1d39ae	SD/PD	iMvigor210
SAM5a2347c0498a	SD/PD	iMvigor210
SAM0571f17f4045	SD/PD	iMvigor210
SAM4b7ea015fd9e	SD/PD	iMvigor210
SAM9306c5c92444	SD/PD	iMvigor210
SAM28e6031ac18b	SD/PD	iMvigor210
SAMd86389d0d768	SD/PD	iMvigor210
SAM63b2189c36d7	SD/PD	iMvigor210
SAM18be5b395318	SD/PD	iMvigor210
SAM0d855cff64e6	SD/PD	iMvigor210
SAM6cbc10abddb0	SD/PD	iMvigor210
SAMdee1011782cd	SD/PD	iMvigor210
SAMe9475f77504b	SD/PD	iMvigor210
SAMe41b1e773582	SD/PD	iMvigor210
SAM978a587b207e	SD/PD	iMvigor210
SAM5234688806a7	SD/PD	iMvigor210
SAM2c9586161ce6	SD/PD	iMvigor210
SAM76a431ba6ce1	SD/PD	iMvigor210
SAM8f2275c36e8c	SD/PD	iMvigor210
SAMab8052a03398	SD/PD	iMvigor210
SAM753d4bb52dbe	SD/PD	iMvigor210
SAM59f392864f5d	SD/PD	iMvigor210
SAM26104d5adc89	SD/PD	iMvigor210
SAMba1a34b5a060	SD/PD	iMvigor210
SAM18a4dabbc557	SD/PD	iMvigor210
SAMfed609955db9	SD/PD	iMvigor210
SAMb8070b7937e7	SD/PD	iMvigor210
SAMf2aae1443f67	SD/PD	iMvigor210
SAM2bba8cb35e48	SD/PD	iMvigor210
SAM5c139c5c1c4f	SD/PD	iMvigor210
SAM6780ed436b55	SD/PD	iMvigor210
SAM85f0a3ac1c45	SD/PD	iMvigor210
SAM9d2494119c05	SD/PD	iMvigor210
SAM9410b866974a	SD/PD	iMvigor210
SAM5d989c86255e	SD/PD	iMvigor210
SAM49d48750e294	SD/PD	iMvigor210
SAM7aa01fc49a80	SD/PD	iMvigor210
SAM0257bbbbd388	SD/PD	iMvigor210
SAMa321770ac31c	SD/PD	iMvigor210
SAM3894ac3956a5	SD/PD	iMvigor210
SAM1c0ecfb3eb63	SD/PD	iMvigor210
SAMbcb07ba81cee	SD/PD	iMvigor210
SAM9aa6a095a9d6	SD/PD	iMvigor210
SAM957378bd907f	SD/PD	iMvigor210
SAMf82bbdc267c8	SD/PD	iMvigor210
SAM2624229effe8	SD/PD	iMvigor210
SAMd2492b2a31bb	SD/PD	iMvigor210
SAM5fe7a81a39dd	SD/PD	iMvigor210
SAM29da928587ad	SD/PD	iMvigor210
SAM0a0f2bac4b20	SD/PD	iMvigor210
SAM8e469834acc1	SD/PD	iMvigor210
SAM12502d970c10	SD/PD	iMvigor210
SAM181b638b8248	SD/PD	iMvigor210
SAMbfdffb97c446	SD/PD	iMvigor210
SAM1c8b086175ca	SD/PD	iMvigor210
SAM1dda30f1c5be	SD/PD	iMvigor210
SAM9daccafc18db	SD/PD	iMvigor210
SAMbda79f955628	SD/PD	iMvigor210
SAM187e056d6a2a	SD/PD	iMvigor210
SAMbc8dc3a7b54e	SD/PD	iMvigor210
SAM568ce160abd9	SD/PD	iMvigor210
SAM1a87df750b9d	SD/PD	iMvigor210
SAMae02629a97f7	SD/PD	iMvigor210
SAM47fc46c3d6be	SD/PD	iMvigor210
SAM7829a341b9f3	SD/PD	iMvigor210
SAM0f956e757453	SD/PD	iMvigor210
SAMaf42c1541269	SD/PD	iMvigor210
SAM09c84ec0cf34	SD/PD	iMvigor210
SAM7538ad9ff524	SD/PD	iMvigor210
SAMb2e4a082541a	SD/PD	iMvigor210
SAM59fda9035d1d	SD/PD	iMvigor210
SAMe56c96c51190	SD/PD	iMvigor210
SAM2b672f4336c7	SD/PD	iMvigor210
SAM1ab1b28d9f2b	SD/PD	iMvigor210
SAM6662f5181f87	SD/PD	iMvigor210
SAMe0c49ea0df5d	SD/PD	iMvigor210
SAM18b9351e265a	SD/PD	iMvigor210
SAM7fb7a13c096b	SD/PD	iMvigor210
SAM87a8e18eb45b	SD/PD	iMvigor210
SAM9725303dce0c	SD/PD	iMvigor210
SAM65afda25b920	SD/PD	iMvigor210
SAMef0e3d2415fd	SD/PD	iMvigor210
SAM94859b440b1d	SD/PD	iMvigor210
SAMc57eadb2d82b	SD/PD	iMvigor210
SAMaabf4afe4213	SD/PD	iMvigor210
SAMce39dd79b441	SD/PD	iMvigor210
SAM75f12d1a55fc	SD/PD	iMvigor210
SAM6964a6d7b967	SD/PD	iMvigor210
SAM3b1066e5801b	SD/PD	iMvigor210
SAMf20b827dca51	SD/PD	iMvigor210
SAM6792d6e98068	SD/PD	iMvigor210
SAM5cc2d9036053	SD/PD	iMvigor210
SAMb8101c538753	SD/PD	iMvigor210
SAM80c6183220e6	SD/PD	iMvigor210
SAM1f83ebd6be9b	SD/PD	iMvigor210
SAMe7e4f7c076a7	SD/PD	iMvigor210
SAMc6eff056c89a	SD/PD	iMvigor210
SAM5cfa1699bdb7	SD/PD	iMvigor210
SAMda4d892fddc8	SD/PD	iMvigor210
SAM3a1c9632ff7b	SD/PD	iMvigor210
SAM8b4b8b0f9e73	SD/PD	iMvigor210
SAMe3d4266775a9	SD/PD	iMvigor210
GSM872328	SD/PD	GSE35640
GSM872329	SD/PD	GSE35640
GSM872330	SD/PD	GSE35640
GSM872331	SD/PD	GSE35640
GSM872332	CR/PR	GSE35640
GSM872333	SD/PD	GSE35640
GSM872334	CR/PR	GSE35640
GSM872335	SD/PD	GSE35640
GSM872336	CR/PR	GSE35640
GSM872337	SD/PD	GSE35640
GSM872338	CR/PR	GSE35640
GSM872339	SD/PD	GSE35640
GSM872340	SD/PD	GSE35640
GSM872341	SD/PD	GSE35640
GSM872342	SD/PD	GSE35640
GSM872343	SD/PD	GSE35640
GSM872344	CR/PR	GSE35640
GSM872345	SD/PD	GSE35640
GSM872346	SD/PD	GSE35640
GSM872347	CR/PR	GSE35640
GSM872348	CR/PR	GSE35640
GSM872349	CR/PR	GSE35640
GSM872350	SD/PD	GSE35640
GSM872351	SD/PD	GSE35640
GSM872352	SD/PD	GSE35640
GSM872353	CR/PR	GSE35640
GSM872354	CR/PR	GSE35640
GSM872355	SD/PD	GSE35640
GSM872356	CR/PR	GSE35640
GSM872357	CR/PR	GSE35640
GSM872358	CR/PR	GSE35640
GSM872359	CR/PR	GSE35640
GSM872360	SD/PD	GSE35640
GSM872361	SD/PD	GSE35640
GSM872362	SD/PD	GSE35640
GSM872363	CR/PR	GSE35640
GSM872364	SD/PD	GSE35640
GSM872365	SD/PD	GSE35640
GSM872366	CR/PR	GSE35640
GSM872367	SD/PD	GSE35640
GSM872368	SD/PD	GSE35640
GSM872369	SD/PD	GSE35640
GSM872370	CR/PR	GSE35640
GSM872371	SD/PD	GSE35640
GSM872372	CR/PR	GSE35640
GSM872373	SD/PD	GSE35640
GSM872374	SD/PD	GSE35640
GSM872375	CR/PR	GSE35640
GSM872376	CR/PR	GSE35640
GSM872377	SD/PD	GSE35640
GSM872378	SD/PD	GSE35640
GSM872379	SD/PD	GSE35640
GSM872380	SD/PD	GSE35640
GSM872381	CR/PR	GSE35640
GSM872382	CR/PR	GSE35640
GSM872383	SD/PD	GSE35640
45	CR/PR	PRJEB25780
68	CR/PR	PRJEB25780
31	CR/PR	PRJEB25780
5	CR/PR	PRJEB25780
10	CR/PR	PRJEB25780
13	CR/PR	PRJEB25780
19	CR/PR	PRJEB25780
20	CR/PR	PRJEB25780
21	CR/PR	PRJEB25780
38	CR/PR	PRJEB25780
44	CR/PR	PRJEB25780
48	CR/PR	PRJEB25780
53	CR/PR	PRJEB25780
59	CR/PR	PRJEB25780
63	CR/PR	PRJEB25780
66	SD/PD	PRJEB25780
6	SD/PD	PRJEB25780
16	SD/PD	PRJEB25780
22	SD/PD	PRJEB25780
26	SD/PD	PRJEB25780
34	SD/PD	PRJEB25780
37	SD/PD	PRJEB25780
40	SD/PD	PRJEB25780
42	SD/PD	PRJEB25780
47	SD/PD	PRJEB25780
49	SD/PD	PRJEB25780
52	SD/PD	PRJEB25780
54	SD/PD	PRJEB25780
56	SD/PD	PRJEB25780
58	SD/PD	PRJEB25780
62	SD/PD	PRJEB25780
64	SD/PD	PRJEB25780
69	SD/PD	PRJEB25780
3	SD/PD	PRJEB25780
14	SD/PD	PRJEB25780
1	SD/PD	PRJEB25780
2	SD/PD	PRJEB25780
4	SD/PD	PRJEB25780
11	SD/PD	PRJEB25780
15	SD/PD	PRJEB25780
18	SD/PD	PRJEB25780
23	SD/PD	PRJEB25780
24	SD/PD	PRJEB25780
25	SD/PD	PRJEB25780
29	SD/PD	PRJEB25780
30	SD/PD	PRJEB25780
32	SD/PD	PRJEB25780
35	SD/PD	PRJEB25780
39	SD/PD	PRJEB25780
41	SD/PD	PRJEB25780
43	SD/PD	PRJEB25780
51	SD/PD	PRJEB25780
55	SD/PD	PRJEB25780
57	SD/PD	PRJEB25780
60	SD/PD	PRJEB25780
67	SD/PD	PRJEB25780
9	SD/PD	PRJEB25780
2p	SD/PD	PRJEB23709
3p	SD/PD	PRJEB23709
4p	SD/PD	PRJEB23709
5p	SD/PD	PRJEB23709
6p	SD/PD	PRJEB23709
7p	SD/PD	PRJEB23709
8p	SD/PD	PRJEB23709
9p	SD/PD	PRJEB23709
10p	SD/PD	PRJEB23709
11p	SD/PD	PRJEB23709
12p	SD/PD	PRJEB23709
13p	SD/PD	PRJEB23709
14p	SD/PD	PRJEB23709
15p	SD/PD	PRJEB23709
16p	SD/PD	PRJEB23709
17p	SD/PD	PRJEB23709
18p	SD/PD	PRJEB23709
19p	SD/PD	PRJEB23709
21p	SD/PD	PRJEB23709
23p	SD/PD	PRJEB23709
25p	CR/PR	PRJEB23709
27p	CR/PR	PRJEB23709
29p	SD/PD	PRJEB23709
30p	SD/PD	PRJEB23709
34p	CR/PR	PRJEB23709
35p	CR/PR	PRJEB23709
36p	CR/PR	PRJEB23709
38p	CR/PR	PRJEB23709
40p	CR/PR	PRJEB23709
41p	CR/PR	PRJEB23709
42p	CR/PR	PRJEB23709
44p	CR/PR	PRJEB23709
45p	CR/PR	PRJEB23709
46p	CR/PR	PRJEB23709
47p	CR/PR	PRJEB23709
48p	CR/PR	PRJEB23709
49p	CR/PR	PRJEB23709
50p	CR/PR	PRJEB23709
52p	CR/PR	PRJEB23709
53p	CR/PR	PRJEB23709
54p	CR/PR	PRJEB23709
1pc	SD/PD	PRJEB23709
2pc	SD/PD	PRJEB23709
6pc	SD/PD	PRJEB23709
7pc	CR/PR	PRJEB23709
8pc	SD/PD	PRJEB23709
10pc	SD/PD	PRJEB23709
12pc	SD/PD	PRJEB23709
13pc	CR/PR	PRJEB23709
14pc	SD/PD	PRJEB23709
15pc	SD/PD	PRJEB23709
17pc	CR/PR	PRJEB23709
19pc	SD/PD	PRJEB23709
20pc	SD/PD	PRJEB23709
21pc	CR/PR	PRJEB23709
23pc	CR/PR	PRJEB23709
24pc	CR/PR	PRJEB23709
25pc	SD/PD	PRJEB23709
26pc	CR/PR	PRJEB23709
27pc	CR/PR	PRJEB23709
32pc	CR/PR	PRJEB23709
33pc	CR/PR	PRJEB23709
34pc	CR/PR	PRJEB23709
35pc	CR/PR	PRJEB23709
36pc	CR/PR	PRJEB23709
37pc	CR/PR	PRJEB23709
38pc	CR/PR	PRJEB23709
44pc	CR/PR	PRJEB23709
45pc	CR/PR	PRJEB23709
46pc	CR/PR	PRJEB23709
47pc	CR/PR	PRJEB23709
49pc	CR/PR	PRJEB23709
50pc	CR/PR	PRJEB23709
